# Supplementary figures and images for: Hepatic vein tumor thrombosis in patients with hepatocellular carcinoma: Prevalence and clinical significance
Source: PubMed Central journal article supplement — United European Gastroenterol J. 2021 Jun 2;9(5):590–7. doi: 10.1002/ueg2.12098 (PMC8259264; doi:10.1002/ueg2.12098), 2021-06-02

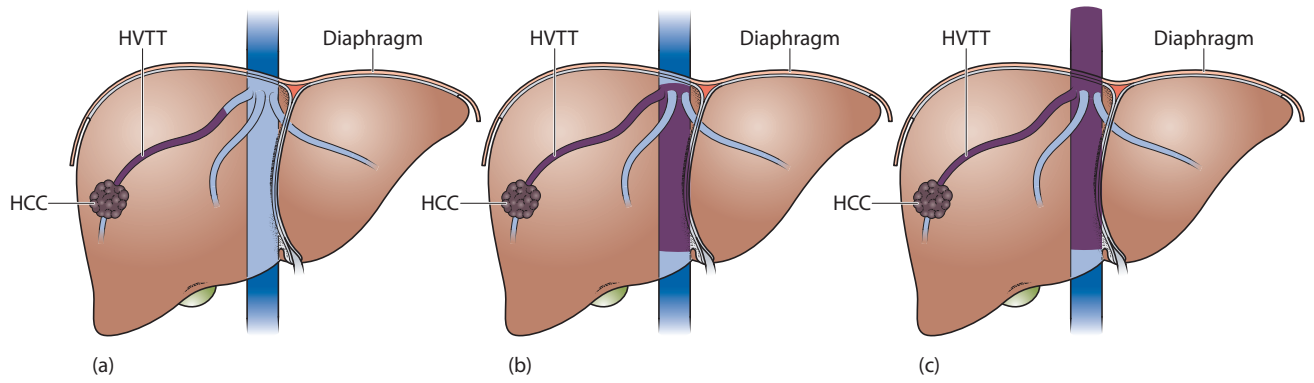

Supplement: UEG2-9-590-s001.pdf [file UEG2-9-590-s001.pdf]

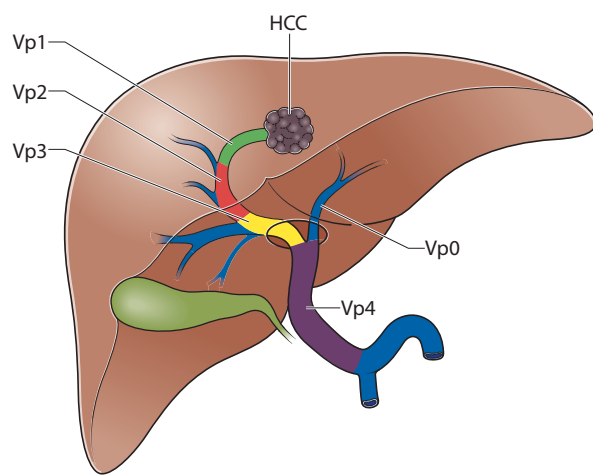

Supplement: UEG2-9-590-s003.pdf [file UEG2-9-590-s003.pdf]
